# Supplementary material
Source: publisher figshare collection journal article supplement (https://tandf.figshare.com/ndownloader/files/20040332)
Supplement: Supplementary file 1 [file 20040332]

Appendix. Fish species and status (Roth et al. 2013) reported from the Credit River watershed, 1954-2015. The slopes of the number of watersheds by decade relationship and distribution trends (see Table 2) are provided. NA – Not Applicable.

| Common Name | Scientific Name | Status | Slope | Trend |
| --- | --- | --- | --- | --- |
| Alewife | *Alosa pseudoharengus* | Non-native | na | Single occurrence |
| American Brook Lamprey | *Lethenteron appendix* | Native | 0.0042 | Stable – limited |
| American Eel | *Anguilla rostrata* | Native | 0.0004 | Stable – limited |
| Atlantic Salmon | *Salmo salar* | Native | 0.0064 | Stable – limited |
| Banded Killifish | *Fundulus diaphanus* | Native | na | Single occurrence |
| Black Crappie | *Pomoxis nigromaculatus* | Native | 0.0028 | Stable – limited |
| Blacknose Dace | *Rhinichthys atratulus* | Native | 0.0026 | Stable – widespread |
| Blacknose Shiner | *Notropis heterolepis* | Native | -0.004 | Decliner – limited |
| Bluntnose Minnow | *Pimephales notatus* | Native | 0.003 | Stable – widespread |
| Brassy Minnow | *Hybognathus hankinsoni* | Native | 0.0058 | Stable – limited |
| Brook Stickleback | *Culaea inconstans* | Native | 0.0043 | Stable – widespread |
| Brook Trout | *Salvelinus fontinalis* | Native | 0.0023 | Stable – limited |
| Brown Bullhead | *Ameiurus nebulosus* | Native | 0.0084 | Spreader |
| Brown Trout | *Salmo trutta* | Non-native | 0.0061 | Spreader |
| Central Mudminnow | *Umbra limi* | Native | 0.0075 | Spreader |
| Central Stoneroller | *Campostoma anomalum* | Non-native | 0.0005 | Stable – limited |
| Chinook Salmon | *Oncorhynchus tshawytscha* | Non-native | 0.0015 | Stable – limited |
| Coho Salmon | *Oncorhynchus kisutch* | Non-native | 0.0009 | Stable – limited |
| Common Carp | *Cyprinus carpio* | Non-native | 0.0024 | Stable – limited |
| Common Shiner | *Luxilus cornutus* | Native | 0.004 | Stable – widespread |
| Creek Chub | *Semotilus atromaculatus* | Native | 0.0032 | Stable – widespread |
| Emerald Shiner | *Notropis atherinoides* | Native | 0.0018 | Stable – limited |
| Fantail Darter | *Etheostoma flabellare* | Native | 0.0059 | Stable – limited |
| Fathead Minnow | *Pimephales promelas* | Native | 0.0122 | Spreader |
| Finescale Dace | *Chrosomus neogaeus* | Native | 0.0016 | Stable – limited |
| Freshwater Drum | *Aplodinotus grunniens* | Native | 0.0004 | Stable – limited |
| Gizzard Shad | *Dorosoma cepedianum* | Native | 0.0009 | Stable – limited |
| Golden Shiner | *Notemigonus crysoleucas* | Native | 0.006 | Stable – limited |
| Goldfish | *Carassius auratus* | Non-native | 0.0033 | Stable – limited |
| Greater Redhorse | *Moxostoma valenciennesi* | Native | 0.0005 | Stable – limited |
| Hornyhead Chub | *Nocomis biguttatus* | Native | 0.005 | Stable – limited |
| Iowa Darter | *Etheostoma exile* | Native | 0.0038 | Stable – limited |
| Johnny Darter | *Etheostoma nigrum* | Native | 0.0033 | Stable – limited |
| Lake Chub | *Couesius plumbeus* | Native | 0.0014 | Stable – limited |
| Largemouth Bass | *Micropterus salmoides* | Native | 0.0099 | Spreader |
| Logperch | *Percina caprodes* | Native | 0.0004 | Stable – limited |
| Longnose Dace | *Rhinichthys cataractae* | Native | 0.0057 | Stable – widespread |
| Longnose Sucker | *Catostomus* | Native | 0.0005 | Stable – limited |
| Mottled Sculpin | *Cottus bairdii* | Native | 0.0036 | Stable – limited |
| Northern Hog Sucker | *Hypentelium nigricans* | Native | 0.0063 | Spreader |
| Northern Pearl Dace | *Margariscus nachtriebi* | Native | 0.0025 | Stable – limited |
| Northern Pike | *Esox lucius* | Native | 0.005 | Stable – limited |
| Northern Redbelly Dace | *Chrosomus eos* | Native | 0.0033 | Stable – limited |
| Pumpkinseed | *Lepomis gibbosus* | Native | 0.0147 | Spreader |
| Rainbow Darter | *Etheostoma caeruleum* | Native | 0.0027 | Stable – limited |
| Rainbow Trout | *Oncorhynchus mykiss* | Non-native | 0.0105 | Spreader |
| Redside Dace | *Clinostomus elongatus* | Native | -0.003 | Decliner – limited |
| River Chub | *Nocomis micropogon* | Native | 0.0047 | Stable – limited |
| Rock Bass | *Ambloplites rupestris* | Native | 0.0043 | Stable – limited |
| Rosyface Shiner | *Notropis rubellus* | Native | 0.0005 | Stable – limited |
| Round Goby | *Neogobius melanostomus* | Non-native | 0.0019 | Stable – limited |
| Sea Lamprey | *Petromyzon marinus* | Non-native | 0.0012 | Stable – limited |
| Shorthead Redhorse | *Moxostoma macrolepidotum* | Native | 0.0009 | Stable – limited |
| Slimy Sculpin | *Cottus cognatus* | Native | na | Single occurrence |
| Smallmouth Bass | *Micropterus dolomieui* | Native | 0.0005 | Stable – limited |
| Spotfin Shiner | *Cyprinella spiloptera* | Native | 0.0007 | Stable – limited |
| Spottail Shiner | *Notropis hudsonius* | Native | 0.0009 | Stable – limited |
| Stonecat | *Noturus flavus* | Native | 0.0054 | Stable – limited |
| Threespine Stickleback | *Gasterosteus aculeatus* | Native | 0.0004 | Stable – limited |
| Trout-perch | *Percopsis omiscomaycus* | Native | 0.0004 | Stable – limited |
| White Bass | *Morone chrysops* | Native | 0.0009 | Stable – limited |
| White Sucker | *Catostomus commersonii* | Native | 0.0035 | Stable – widespread |
| Yellow Perch | *Perca flavescens* | Native | 0.0027 | Stable – limited |
